# Supplementary material
Source: publisher site journal article supplement (https://www.dovepress.com/article/553918)
Supplement: Supplementary file 1 [file 553918-supplementary-materials_1.docx%2527]

**Supplementary materials**

**Supplementary Table S1**. PK and PD Sampling Schedule

| **Study** | **Plasma PK** | **Serum PD** | **Urine PD** |
| --- | --- | --- | --- |
| SAD | Pre-dose, 0.5, 1, 2, 3, 4, 6, 8, 12, 24, 48, and 72 h post-dose | Pre-dose, 3, 6, 12, 24, 48, and 72 h post-dose | Pre-dose, 0-6 h, 6-12 h, 12-24 h, 24-36 h, 36-48 h, 48-60 h, and 60-72 h |
| MAD | Pre-dose, 0.5, 1, 2, 3, 4, 6, 8, 12 h on days 1, 5, and 10;  24 h on days 2, 6, and 11;  48 h on day 12;  72 h on day 13;  Pre-dose on days 3, 4, 7, 8, 9, and 10 | Pre-dose, 3, 6, 12 h on days 1, 5, and 10;  24 h on days 2, 6, and 11;  48 h on day 12;  72 h on day 13;  Pre-dose on days 3, 4, 7, 8, 9, and 10 | Pre-dose, 0-6 h, 6-12 h, 12-24 h on days 1, 5, and 10;  24–36 h, 36-48 h, 48-60 h, 60-72 h on days 11, 12, and 13;  Pre-dose on days 3, 4, 7, 8, and 9 |
| Food-effect | Pre-dose, 0.5, 1, 2, 3, 4, 6, 8, 12 h on days 1 and 6;  24 h on days 2 and 7;  48 h on days 3 and 8;  72 h on days 4 and 9 | Pre-dose, 3, 6, 12 h on days 1 and 6;  24 h on days 2 and 7;  48 h on days 3 and 8;  72 h on days 4 and 9 | Pre-dose, 0-6 h, 6-12 h, 12-24 h, 24-36 h, 36-48 h, 48-60 h, and 60-72 h |

PK: pharmacokinetics; PD: pharmacodynamics; SAD: single ascending dose; MAD: multiple ascending dose.

**Supplementary Table S2**. Safety profile

|  | **SAD (n=24)** | | | | **MAD (n=27)** | | | | **Food effect** | |
| --- | --- | --- | --- | --- | --- | --- | --- | --- | --- | --- |
| 0.1 mg (n=6) | 0.5 mg (n=6) | 1.0 mg (n=6) | Placebo (n=6) | 0.2 mg (n=7) | 0.5 mg (n=7) | 1.0 mg (n=7) | Placebo (n=6) | Fasted (n=12) | Fed (n=12) |
| TEAE | 1 (17%) | 1 (17%) | 2 (33%) | 0 | 2 (29%) | 4 (57%) | 1 (14%) | 2 (33%) | 3 (25.0%) | 2 (16.7%) |
| SAE | 0 | 0 | 0 | 0 | 0 | 0 | 0 | 0 | 0 | 0 |
| TEAE leading to drug discontinuation | 0 | 0 | 0 | 0 | 0 | 0 | 0 | 0 | 0 | 0 |
| TEAE leading to death | 0 | 0 | 0 | 0 | 0 | 0 | 0 | 0 | 0 | 0 |

TEAE: treatment-emergent adverse event; SAE: serious adverse event.

**Supplementary Table S3.** PD parameter measurements at 6 and 24 h in the SAD study

| **Dose group** | **0.1 mg (n=6)** | **0.5 mg (n=6)** | **1.0 mg (n=6)** | **Placebo (n=6)** |
| --- | --- | --- | --- | --- |
| Percentage change from baseline in sUA | | | | |
| 6 h | -2.5±3.51 | -26.0±6.45 | -29.4±8.17 | 5.3±3.24 |
| 24 h | -6.8±5.89 | -23.8±7.65 | -26.5±12.33 | 2.1±8.07 |
| Percentage change from baseline in UA fractional excretion | | | | |
| 6 h | 101.4±53.09 | 434.9±115.65 | 472.4±239.76 | 19.4±19.87 |
| 24 h | 5.3±12.81 | 31.0±24.62 | 14.7±29.06 | -0.0±22.42 |

SAD: single ascending dose; PD: pharmacokinetics; sUA: serum uric acid; UA: uric acid.

**Supplementary Table S4.** PD parameter measurements at 6 h and 24 h on days 1, 5, and 10 in the MAD study

| Dose group | Day 1 | | | | Day 5 | | | | Day 10 | | | |
| --- | --- | --- | --- | --- | --- | --- | --- | --- | --- | --- | --- | --- |
| 0.2 mg (n=7) | 0.5 mg (n=7) | 1.0 mg (n=7) | Placebo (n=6) | 0.2 mg (n=7) | 0.5 mg (n=7) | 1.0 mg (n=6) | Placebo (n=6) | 0.2 mg (n=7) | 0.5 mg (n=7) | 1.0 mg (n=6) | Placebo (n=6) |
| Percentage change from baseline in sUA | | | | | | | | | | | | |
| 6 h | -9.2±5.74 | -23.2±4.14 | -27.8±8.42 | -2.1±2.37 | -25.1±11.37 | -38.6±4.86 | -43.3±5.09 | -10.9±5.56 | -23.2±10.57 | -38.5±4.55 | -43.8±4.37 | -8.1±7.08 |
| 24 h | -5.5±7.88 | -19.7±6.23 | -20.6±7.62 | -1.1±5.63 | -13.4±10.07 | -24.1±3.92 | -30.4±4.54 | -4.4±6.67 | -11.7±11.45 | -22.2±3.64 | -26.6±4.32 | -2.0±5.44 |
| Percentage change from baseline in UA fractional excretion | | | | | | | | | | | | |
| 6 h | 262.2±143.17 | 327.3±60.36 | 463.6±120.97 | 45.3±47.04 | 148.4±90.69 | 236.2±54.97 | 175.9±82.97 | 36.3±21.15 | 117.9±53.02 | 218.0±36.69 | 330.7±89.00 | 22.0±13.73 |
| 24 h | 12.1±27.46 | -1.1±11.70 | 17.1±16.03 | -6.7±14.60 | -21.7±17.69 | -27.2±11.40 | -3.3±16.54 | -10.6±17.73 | -20.5±18.24 | -23.5±12.43 | -10.4±18.24 | -13.7±19.97 |

MAD: multiple ascending dose; PD: pharmacokinetics; sUA: serum uric acid; UA: uric acid.
